# Supplementary material for: Comparative study of guanidine-based and lysine-based brush copolymers for plasmid delivery
Source: Royal Society of Chemistry journal article supplement (doi:10.1039/c3bm60079c), 2013-01-01
Supplement: c3bm60079c.pdf [file c3bm60079c.pdf]

Cite this: DOI: 10.1039/c0xx00000x

www.rsc.org/xxxxxx

ARTICLE TYPE

## Comparative study of guanidine-based and lysine-based brush copolymers for plasmid delivery

### Supplemental Figures

Received (in XXX, XXX) Xth XXXXXXXXXX 20XX, Accepted Xth XXXXXXXXXX 20XX

DOI: 10.1039/b000000x

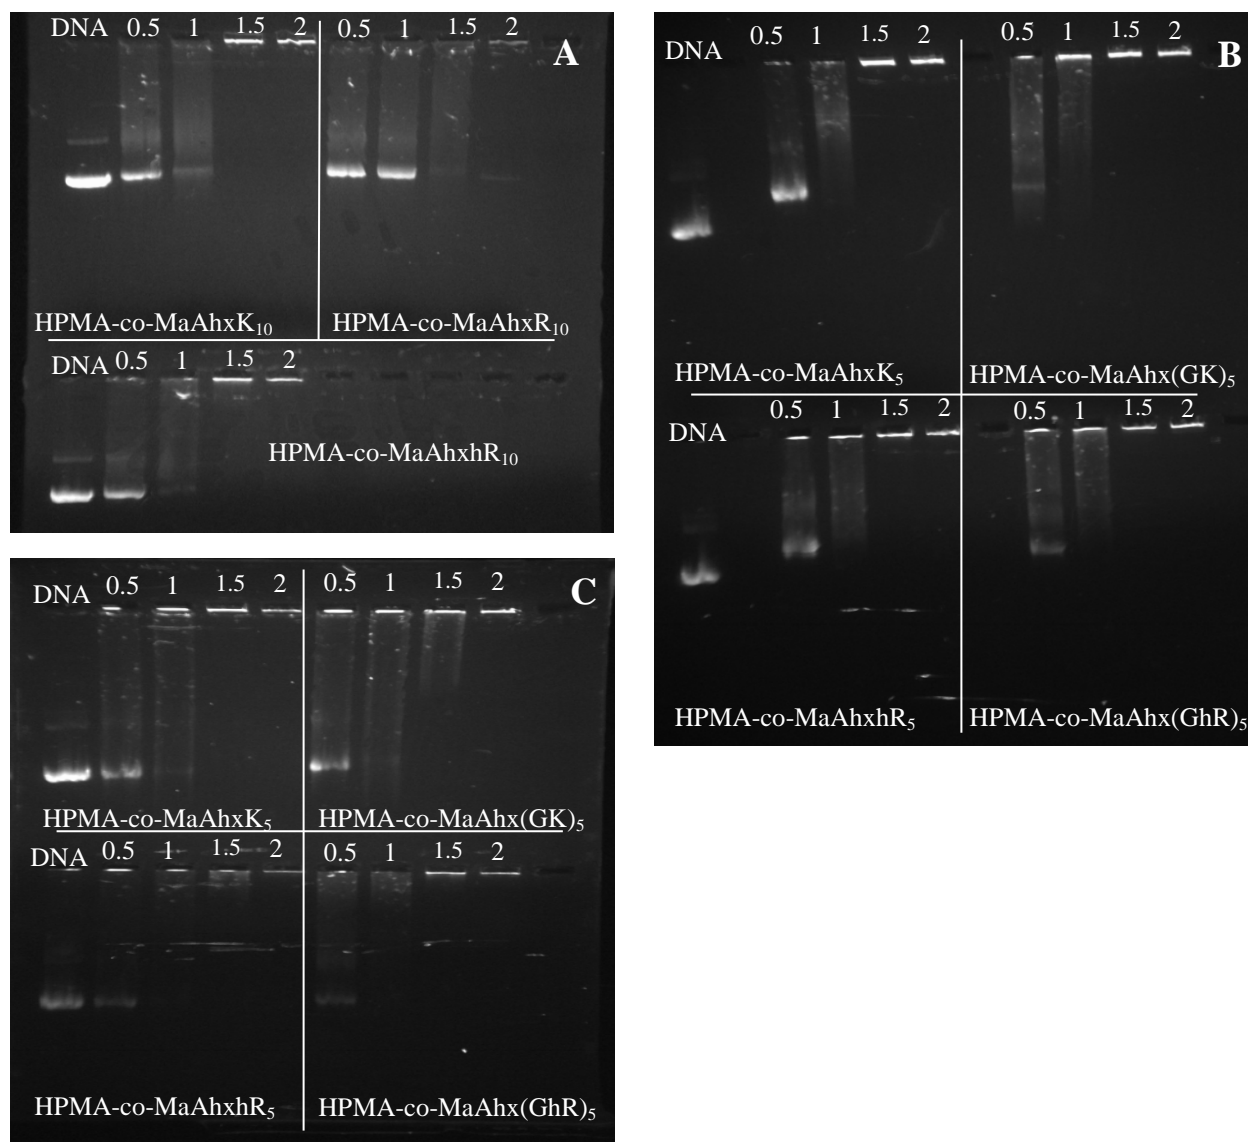

**Fig. S1** Gel retardation assays for all synthesized copolymers. All copolymers were complexed with DNA at N/P ratios of 0.5, 1, 1.5, and 2 as labeled above. The presence of a migrating DNA band indicates incomplete complexation. All copolymers formed stable complexes at N/P ratios above 1.5. A) decamer peptide copolymers. B) pentamer peptide copolymers at 20% mol incorporation. C) pentamer peptide copolymers at 40% mol incorporation

Cite this: DOI: 10.1039/c0xx00000x

www.rsc.org/xxxxxx

ARTICLE TYPE

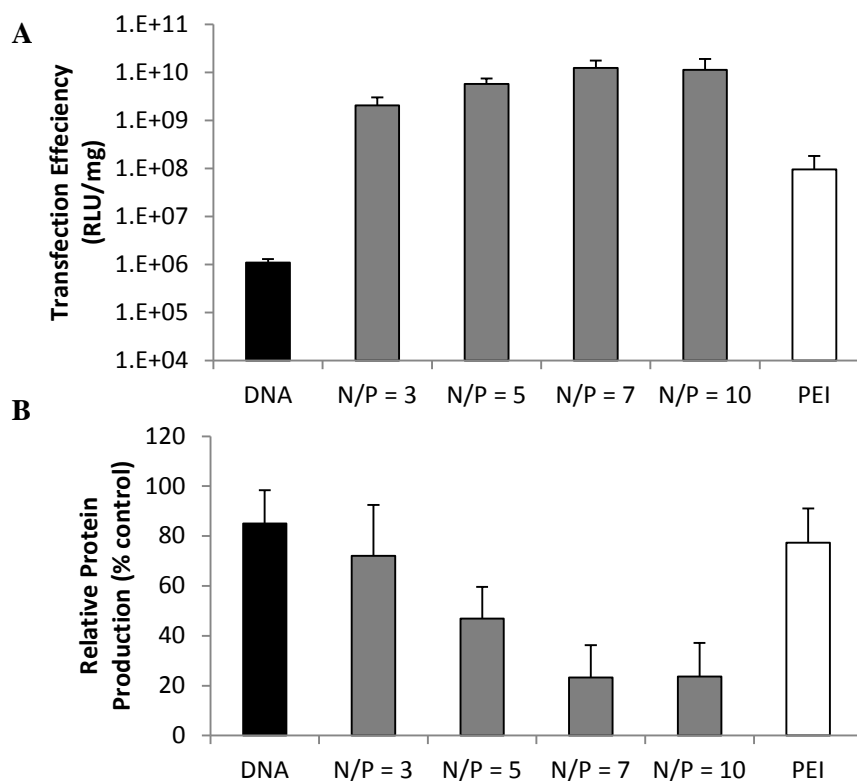

5 **Fig. S2** Transfection efficiency (A) and Cytotoxicity (B) of cells transfected with the luciferase transgene using the HPMA-co-MaAhxK10 copolymer delivery vehicle. The range of N/P ratios tested indicates that while marginally higher luciferase expression is observed at higher N/P ratios (7 and 10), total protein production decreases dramatically indicating significant toxicity.
